# Supplementary material for: Novel Peritoneal Sclerosis Rat Model Developed by Administration of Bleomycin and Lansoprazole
Source: MDPI journal article supplement (doi:10.3390/ijms242216108), 2023-11-09
Supplement: s1 [file s1]

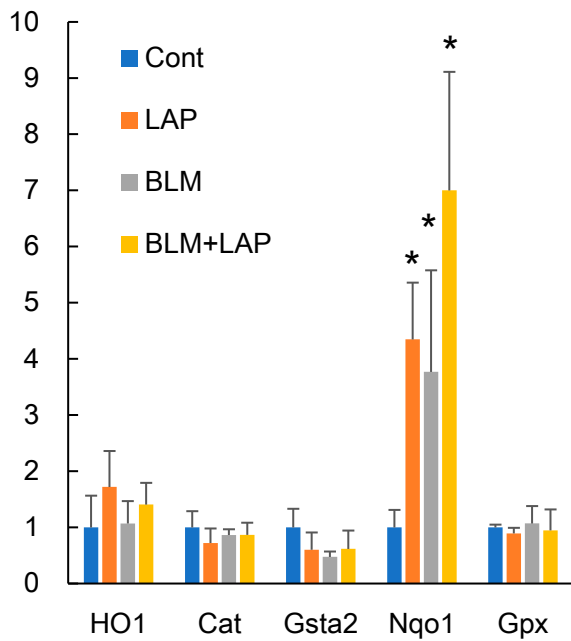

Supplemental Figure S1. The effect of lansoprazole and/or bleomycin for four weeks on expression changes of antioxidative stress proteins.

The expression changes of anti-oxidative stress protein genes were measured. Asterisks indicate significant difference compared with the control ( $P < 0.05$ ). Each five rats were allocated in control, lansoprazole, or bleomycin, and six rats were allocated in BLM+LAP groups.  $P$  values were calculated by Dunnet's test. LAP: lansoprazole, BLM: bleomycin.

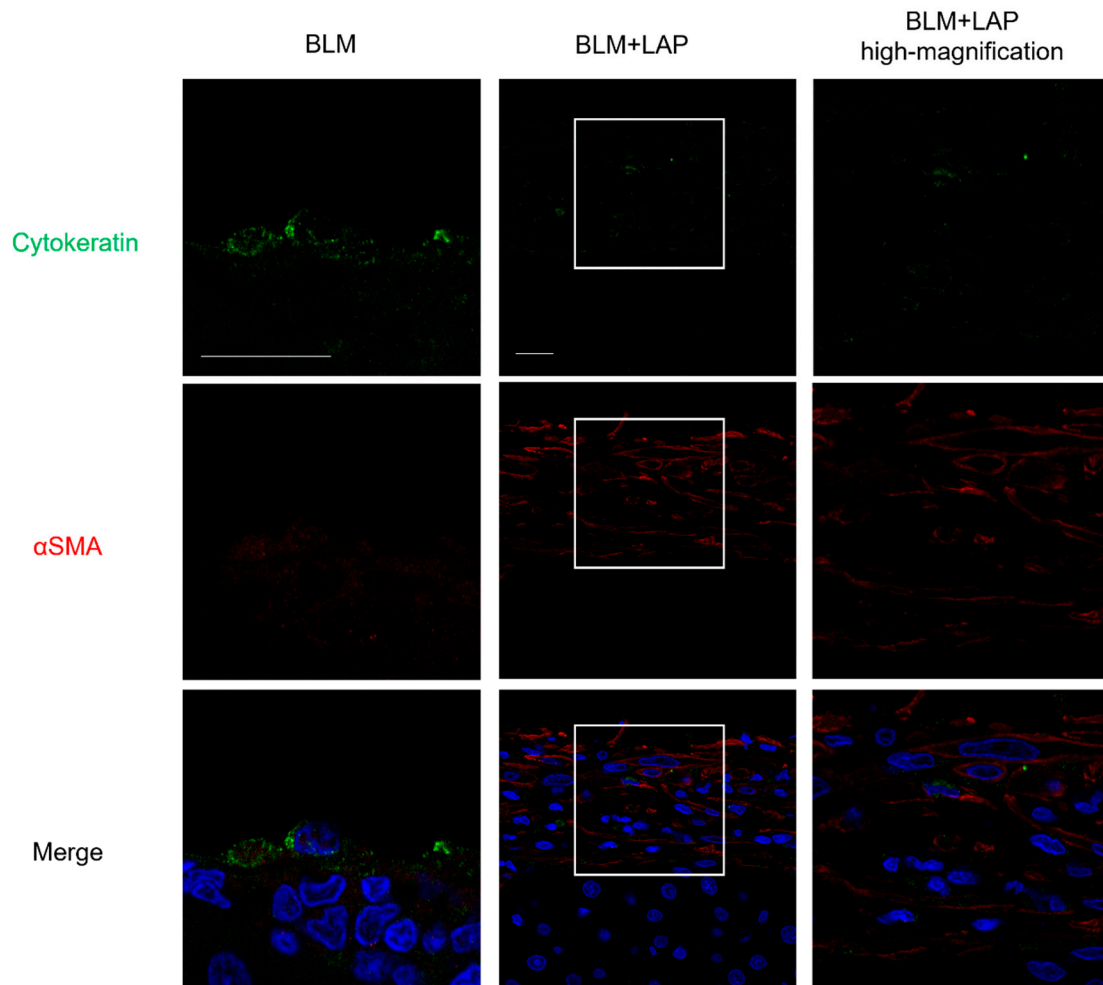

Supplemental Figure S2. Administration of BLM+LAP was associated with mesothelial-mesenchymal transition.

In one out of five rats from BLM group, reactive mesothelial cells were detected. Immunoreactivity against cytokeratin was detected and it against  $\alpha$ SMA was slightly detected in the reactive mesothelial cells from BLM group. The immunoreactivity against cytokeratin was weak in a case in which the peritoneal tissue was thickened from BLM+LAP group. Scale bar indicates 60  $\mu$ m.

Supplemental Table S1. Result of two-way ANOVA in the expression of chemokines

|               | Lansoprazole |      | Bleomycin |      | Interaction |      |
|---------------|--------------|------|-----------|------|-------------|------|
|               | F            | P    | F         | P    | F           | P    |
| 2w outer part |              |      |           |      |             |      |
| Ip10          | 0.48         | 0.50 | 5.05      | 0.04 | 0.95        | 0.34 |
| Mip1a         | 8.04         | 0.01 | 10.86     | 0.00 | 15.44       | 0.00 |
| Mcp1          | 0.00         | 0.97 | 0.01      | 0.94 | 2.26        | 0.15 |
| Mcp3          | 0.00         | 0.99 | 0.00      | 0.99 | 2.26        | 0.15 |
| Rantes        | 0.51         | 0.49 | 1.58      | 0.23 | 0.01        | 0.93 |
| 4w outer part |              |      |           |      |             |      |
| Ip10          | 2.80         | 0.11 | 0.17      | 0.68 | 0.79        | 0.39 |
| Mip1a         | 3.53         | 0.08 | 1.46      | 0.24 | 1.44        | 0.25 |
| Mcp1          | 0.00         | 0.98 | 0.63      | 0.44 | 9.47        | 0.01 |
| Mcp3          | 0.00         | 0.98 | 1.41      | 0.25 | 2.52        | 0.13 |
| Rantes        | 0.94         | 0.35 | 0.00      | 0.97 | 1.08        | 0.32 |
| 2w inner part |              |      |           |      |             |      |
| Ip10          | 3.08         | 0.10 | 4.79      | 0.04 | 3.10        | 0.10 |
| Mip1a         | 8.62         | 0.01 | 5.72      | 0.03 | 13.18       | 0.00 |
| Mcp1          | 5.24         | 0.04 | 7.69      | 0.01 | 8.87        | 0.01 |
| Mcp3          | 0.44         | 0.52 | 0.30      | 0.59 | 1.49        | 0.24 |
| Rantes        | 0.04         | 0.84 | 5.05      | 0.04 | 2.28        | 0.15 |
| 4w inner part |              |      |           |      |             |      |
| Ip10          | 2.15         | 0.16 | 0.00      | 0.99 | 1.26        | 0.28 |
| Mip1a         | 1.32         | 0.27 | 1.31      | 0.27 | 0.58        | 0.46 |
| Mcp1          | 0.06         | 0.82 | 0.00      | 0.95 | 0.09        | 0.77 |
| Mcp3          | 0.05         | 0.82 | 0.17      | 0.69 | 0.00        | 0.99 |
| Rantes        | 0.26         | 0.62 | 0.06      | 0.80 | 0.78        | 0.39 |
